# Supplementary material for: From BaAlBO3F2 to BaAlB3O6F2 and BaAl2(B3O6)2F2: the enhancement of birefringence and band gap by extending the π-conjugated system combined with [Al–O/F] functional groups
Source: Royal Society of Chemistry journal article supplement (doi:10.1039/d4qi01530d), 2024-01-01
Supplement: d4qi01530d1.pdf [file d4qi01530d1.pdf]

## Supporting Information

### From $\text{BaAlBO}_3\text{F}_2$ to $\text{BaAlB}_3\text{O}_6\text{F}_2$ and $\text{BaAl}_2(\text{B}_3\text{O}_6)_2\text{F}_2$ : the Enhancement of Birefringence and Band Gap by Extending the $\pi$ -Conjugated System Combined with [Al-O/F] Functional Groups

Cheng Chen,<sup>a</sup> Danyang Dou,<sup>a</sup> Yunjie Bai,<sup>a</sup> Bingbing Zhang,<sup>ab</sup> Ying Wang<sup>ab\*</sup>

<sup>a</sup> College of Chemistry and Materials Science, Hebei Research Center of the Basic Discipline of Synthetic Chemistry, Key Laboratory of Medicinal Chemistry and Molecular Diagnosis of the Ministry of Education, Key Laboratory of Chemical Biology of Hebei Province, Hebei University, Baoding 071002, China. Email: wangy@hbu.edu.cn

<sup>b</sup>Institute of Life Science and Green Development, Hebei University, Baoding 071002, China.

### Table of Contents

**Table S1.** Crystal data and structure refinements for  $\text{BaAlB}_3\text{O}_6\text{F}_2$  and  $\text{BaAl}_2(\text{B}_3\text{O}_6)_2\text{F}_2$ .

**Table S2.** Atomic coordinates and equivalent isotropic displacement parameters for  $\text{BaAlB}_3\text{O}_6\text{F}_2$ .

**Table S3.** Atomic coordinates and equivalent isotropic displacement parameters for  $\text{BaAl}_2(\text{B}_3\text{O}_6)_2\text{F}_2$ .

**Table S4.** Bond lengths [ $\text{\AA}$ ] for  $\text{BaAlB}_3\text{O}_6\text{F}_2$ .

**Table S5.** Bond angles [deg] for  $\text{BaAlB}_3\text{O}_6\text{F}_2$ .

**Table S6.** Bond lengths [ $\text{\AA}$ ] for  $\text{BaAl}_2(\text{B}_3\text{O}_6)_2\text{F}_2$ .

**Table S7.** Bond angles [deg] for  $\text{BaAl}_2(\text{B}_3\text{O}_6)_2\text{F}_2$ .

**Table S8.** Comparison of bandgap and birefringence for the known F-containing aluminoborates and the arrangement of the [Al-O/F] groups.

**Figure. S1.** Different arrangement of [Al-O/F] groups in (a)  $\text{BaAlBO}_3\text{F}_2$ , (b)  $\text{BaAlB}_3\text{O}_6\text{F}_2$  and (c)  $\text{BaAl}_2(\text{B}_3\text{O}_6)_2\text{F}_2$ .

**Figure. S2.** The experimental and calculated sample XRD patterns of (a)  $\text{BaAlB}_3\text{O}_6\text{F}_2$  and (b)  $\text{BaAl}_2(\text{B}_3\text{O}_6)_2\text{F}_2$ .

**Figure. S3.** TG/DSC curves of (a)  $\text{BaAlB}_3\text{O}_6\text{F}_2$  and (b)  $\text{BaAl}_2(\text{B}_3\text{O}_6)_2\text{F}_2$ .

**Figure. S4.** IR Spectra of (a)  $\text{BaAlB}_3\text{O}_6\text{F}_2$  and (b)  $\text{BaAl}_2(\text{B}_3\text{O}_6)_2\text{F}_2$ .

**Figure. S5.** The measurement of thickness of (a)  $\text{BaAlB}_3\text{O}_6\text{F}_2$  and (b)  $\text{BaAl}_2(\text{B}_3\text{O}_6)_2\text{F}_2$ .

**Figure. S6.** The calculated band gaps (HSE06) of (a)  $\text{BaAlB}_3\text{O}_6\text{F}_2$  and (b)  $\text{BaAl}_2(\text{B}_3\text{O}_6)_2\text{F}_2$ .

**References**

**Table S1.** Crystal data and structure refinements for BaAlB<sub>3</sub>O<sub>6</sub>F<sub>2</sub> and BaAl<sub>2</sub>(B<sub>3</sub>O<sub>6</sub>)<sub>2</sub>F<sub>2</sub>.

| Empirical formula                                           | BaAlB <sub>3</sub> O <sub>6</sub> F <sub>2</sub>                 | BaAl <sub>2</sub> (B <sub>3</sub> O <sub>6</sub> ) <sub>2</sub> F <sub>2</sub> |
|-------------------------------------------------------------|------------------------------------------------------------------|--------------------------------------------------------------------------------|
| Formula weight                                              | 330.75                                                           | 486.16                                                                         |
| Temperature [K]                                             | 273(2)                                                           | 273(2)                                                                         |
| Crystal system                                              | monoclinic                                                       | trigonal                                                                       |
| Space group (number)                                        | <i>P</i> 2 <sub>1</sub> / <i>c</i> (14)                          | <i>R</i> $\bar{3}$ <i>c</i> (167)                                              |
| <i>a</i> [Å]                                                | 7.1245(6)                                                        | 7.0654(18)                                                                     |
| <i>b</i> [Å]                                                | 12.7080(10)                                                      | 7.0654(18)                                                                     |
| <i>c</i> [Å]                                                | 7.6246(7)                                                        | 37.529(13)                                                                     |
| $\alpha$ [°]                                                | 90                                                               | 90                                                                             |
| $\beta$ [°]                                                 | 112.189(3)                                                       | 90                                                                             |
| $\gamma$ [°]                                                | 90                                                               | 120                                                                            |
| Volume [Å <sup>3</sup> ]                                    | 639.19(10)                                                       | 1622.5(10)                                                                     |
| <i>Z</i>                                                    | 4                                                                | 6                                                                              |
| $\rho_{\text{calc}}$ [g cm <sup>-3</sup> ]                  | 3.437                                                            | 2.958                                                                          |
| $\mu$ [mm <sup>-1</sup> ]                                   | 6.381                                                            | 3.935                                                                          |
| <i>F</i> (000)                                              | 600                                                              | 1356                                                                           |
| Radiation                                                   | MoK $\alpha$ ( $\lambda=0.71073$ Å)                              | MoK $\alpha$ ( $\lambda=0.71073$ Å)                                            |
| 2 $\theta$ range [°]                                        | 6.41 to 55.12                                                    | 6.51 to 65.56                                                                  |
| Index ranges                                                | -9 $\leq h \leq$ 9<br>-16 $\leq k \leq$ 15<br>-9 $\leq l \leq$ 9 | -10 $\leq h \leq$ 10<br>-10 $\leq k \leq$ 10<br>-55 $\leq l \leq$ 54           |
| Reflections collected                                       | 15684                                                            | 17663                                                                          |
| Independent reflections                                     | 1457                                                             | 644                                                                            |
|                                                             | $R_{\text{int}} = 0.0250$                                        | $R_{\text{int}} = 0.0250$                                                      |
|                                                             | $R_{\text{sigma}} = 0.0115$                                      | $R_{\text{sigma}} = 0.0115$                                                    |
| Completeness                                                | 98.9 %                                                           | 100.0 %                                                                        |
| Data / Restraints / Parameters                              | 1457/0/118                                                       | 644/0/36                                                                       |
| Goodness-of-fit on $F^2$                                    | 1.141                                                            | 1.082                                                                          |
| Final <i>R</i> indexes [ $I \geq 2\sigma(I)$ ] <sup>a</sup> | $R_1 = 0.0110$ , $wR_2 = 0.0277$                                 | $R_1 = 0.0346$ , $wR_2 = 0.0759$                                               |
| Final <i>R</i> indexes [all data] <sup>a</sup>              | $R_1 = 0.0113$ , $wR_2 = 0.0278$                                 | $R_1 = 0.0612$ , $wR_2 = 0.0850$                                               |
| Largest peak/hole [eÅ <sup>-3</sup> ]                       | 0.32/-0.45                                                       | 1.00/-1.52                                                                     |

<sup>a</sup>  $R_1 = F_o - F_c/F_o$  and  $wR_2 = [w(F_o^2 - F_c^2)^2/wF_o^4]^{1/2}$  for  $F_o^2 > 2(F_c^2)$ .

**Table S2.** Atomic coordinates and equivalent isotropic displacement parameters for  $\text{BaAlB}_3\text{O}_6\text{F}_2$ .  $U(\text{eq})$  is defined as one-third of the trace of the orthogonalized  $U_{ij}$  tensor.

| Atom | $x$         | $y$         | $z$         | $U_{\text{eq}}$ | $BVS$ |
|------|-------------|-------------|-------------|-----------------|-------|
| Ba1  | -0.15914(2) | 0.14249(2)  | 0.87733(2)  | 0.00965(4)      | 2.3   |
| Al1  | -0.04628(8) | 0.09632(4)  | 0.38295(7)  | 0.00789(10)     | 3.1   |
| B1   | 0.2955(3)   | 0.23551(16) | 0.5266(3)   | 0.0105(4)       | 3.0   |
| B2   | 0.5292(3)   | 0.39297(15) | 0.6556(3)   | 0.0094(4)       | 3.0   |
| B3   | 0.6407(3)   | 0.56044(16) | 0.8284(3)   | 0.0109(4)       | 3.0   |
| O1   | 0.11738(19) | 0.21076(10) | 0.39411(19) | 0.0116(3)       | 2.1   |
| O2   | 0.3522(2)   | 0.34022(10) | 0.5523(2)   | 0.0136(3)       | 1.9   |
| O3   | 0.7143(2)   | 0.35447(10) | 0.69269(19) | 0.0111(3)       | 2.0   |
| O4   | 0.49269(19) | 0.49536(10) | 0.7083(2)   | 0.0140(3)       | 2.1   |
| O5   | 0.83160(19) | 0.52964(10) | 0.91797(19) | 0.0114(3)       | 2.2   |
| O6   | 0.5740(2)   | 0.66074(10) | 0.8511(2)   | 0.0144(3)       | 2.1   |
| F1   | 0.02187(17) | 0.03584(9)  | 0.20052(15) | 0.0142(2)       | 1.1   |
| F2   | 0.13429(18) | 0.16314(9)  | 0.54769(16) | 0.0157(2)       | 1.0   |

**Table S3.** Atomic coordinates and equivalent isotropic displacement parameters for  $\text{BaAl}_2(\text{B}_3\text{O}_6)_2\text{F}_2$ .  $U(\text{eq})$  is defined as one-third of the trace of the orthogonalized  $U_{ij}$  tensor.

| Atom | $x$       | $y$       | $z$         | $U_{\text{eq}}$ | $BVS$ |
|------|-----------|-----------|-------------|-----------------|-------|
| Ba1  | 0.666667  | 0.333333  | 0.583333    | 0.02168(17)     | 1.8   |
| Al1  | 0.666667  | 0.333333  | 0.69801(4)  | 0.0146(3)       | 3.1   |
| B1   | 0.4966(6) | 0.6087(6) | 0.71292(9)  | 0.0187(6)       | 3.0   |
| F1   | 0.666667  | 0.333333  | 0.65367(10) | 0.0286(8)       | 1.0   |
| O1   | 0.5505(4) | 0.8269(4) | 0.71260(7)  | 0.0238(5)       | 1.9   |
| O2   | 0.6542(3) | 0.5590(3) | 0.71370(6)  | 0.0213(5)       | 2.0   |

**Table S4.** Bond lengths [ $\text{\AA}$ ] for  $\text{BaAlB}_3\text{O}_6\text{F}_2$ .

| Atom-Atom             | lengths    | Atom-Atom             | lengths    |
|-----------------------|------------|-----------------------|------------|
| Ba1–F2                | 2.5987(12) | Al1–O1                | 1.8458(14) |
| Ba1–F1 <sup>#1</sup>  | 2.6234(11) | Al1–O3 <sup>#7</sup>  | 1.8806(14) |
| Ba1–F1 <sup>#2</sup>  | 2.6780(11) | Al1–O5 <sup>#7</sup>  | 1.8883(14) |
| Ba1–O1 <sup>#3</sup>  | 2.6805(13) | Al1–O5 <sup>#8</sup>  | 1.8995(14) |
| Ba1–F2 <sup>#3</sup>  | 2.7652(12) | Al1–Al1 <sup>#1</sup> | 2.9538(10) |
| Ba1–O6 <sup>#4</sup>  | 2.8166(13) | B1–O1                 | 1.327(2)   |
| Ba1–O3 <sup>#5</sup>  | 2.8697(14) | B1–O2                 | 1.383(2)   |
| Ba1–O4 <sup>#4</sup>  | 2.8979(13) | B1–O6 <sup>#8</sup>   | 1.408(2)   |
| Ba1–O3 <sup>#6</sup>  | 3.0155(13) | B2–O3                 | 1.333(2)   |
| Ba1–B3 <sup>#4</sup>  | 3.355(2)   | B2–O2                 | 1.382(2)   |
| Ba1–B1 <sup>#3</sup>  | 3.377(2)   | B2–O4                 | 1.415(2)   |
| Ba1–Al1 <sup>#3</sup> | 3.4117(6)  | B3–O5                 | 1.329(2)   |
| Al1–F1                | 1.8088(12) | B3–O4                 | 1.381(2)   |
| Al1–F2                | 1.8130(13) | B3–O6                 | 1.394(2)   |

Symmetry transformations used to generate equivalent atoms:

#1: -X, -Y, 1-Z; #2: +X, +Y, 1+Z; #3: +X, 0.5-Y, 0.5+Z; #4: -X, -0.5+Y, 1.5-Z; #5: -1+X, 0.5-Y, 0.5+Z; #6: -1+X, +Y, +Z; #7: -1+X, 0.5-Y, -0.5+Z; #8: 1-X, -0.5+Y, 1.5-Z; #9: +X, 0.5-Y, -0.5+Z; #10: +X, +Y, -1+Z; #11: -X, 0.5+Y, 1.5-Z; #12: 1+X, 0.5-Y, 0.5+Z; #13: 1+X, 0.5-Y, -0.5+Z; #14: 1+X, +Y, +Z; #15: 1-X, 0.5+Y, 1.5-Z;

**Table S5.** Bond angles [deg] for BaAlB<sub>3</sub>O<sub>6</sub>F<sub>2</sub>.

| Atom–Atom–Atom | Angle [°] | Atom–Atom–Atom | Angle [°] |
|----------------|-----------|----------------|-----------|
| F2–Ba1–F1      | 72.61(3)  | F1–Ba1–B3      | 91.64(4)  |
| F2–Ba1–F1      | 139.11(3) | F1–Ba1–B3      | 108.97(4) |
| F1–Ba1–F1      | 71.33(4)  | O1–Ba1–B3      | 147.35(4) |
| F2–Ba1–O1      | 70.04(4)  | F2–Ba1–B3      | 111.72(4) |
| F1–Ba1–O1      | 106.36(4) | O6–Ba1–B3      | 24.14(4)  |
| F1–Ba1–O1      | 102.61(4) | O3–Ba1–B3      | 78.84(4)  |
| F2–Ba1–F2      | 110.39(2) | O4–Ba1–B3      | 24.12(4)  |
| F1–Ba1–F2      | 156.16(4) | O3–Ba1–B3      | 89.23(4)  |
| F1–Ba1–F2      | 95.55(3)  | F2–Ba1–B1      | 82.68(5)  |
| O1–Ba1–F2      | 55.98(4)  | F1–Ba1–B1      | 94.63(4)  |
| F2–Ba1–O6      | 80.36(4)  | F1–Ba1–B1      | 81.66(4)  |
| F1–Ba1–O6      | 108.96(4) | O1–Ba1–B1      | 21.64(4)  |
| F1–Ba1–O6      | 129.70(4) | F2–Ba1–B1      | 63.16(4)  |
| O1–Ba1–O6      | 123.56(4) | O6–Ba1–B1      | 145.02(4) |
| F2–Ba1–O6      | 94.76(4)  | O3–Ba1–B1      | 106.05(4) |
| F2–Ba1–O3      | 165.20(4) | O4–Ba1–B1      | 166.56(4) |
| F1–Ba1–O3      | 117.59(3) | O3–Ba1–B1      | 80.03(4)  |
| F1–Ba1–O3      | 55.27(3)  | B3–Ba1–B1      | 168.99(5) |
| O1–Ba1–O3      | 114.11(4) | F2–Ba1–Al1     | 79.17(3)  |
| F2–Ba1–O3      | 65.10(3)  | F1–Ba1–Al1     | 137.48(3) |
| O6–Ba1–O3      | 85.90(4)  | F1–Ba1–Al1     | 116.84(3) |
| F2–Ba1–O4      | 101.35(4) | O1–Ba1–Al1     | 32.55(3)  |
| F1–Ba1–O4      | 74.68(4)  | F2–Ba1–Al1     | 32.01(3)  |
| F1–Ba1–O4      | 87.12(4)  | O6–Ba1–Al1     | 96.60(3)  |
| O1–Ba1–O4      | 170.08(4) | O3–Ba1–Al1     | 97.09(3)  |
| F2–Ba1–O4      | 125.72(4) | O4–Ba1–Al1     | 143.12(3) |
| O6–Ba1–O4      | 48.25(4)  | O3–Ba1–Al1     | 33.31(3)  |
| O3–Ba1–O4      | 72.96(4)  | B3–Ba1–Al1     | 120.19(4) |
| F2–Ba1–O3      | 64.90(4)  | B1–Ba1–Al1     | 50.03(4)  |
| F1–Ba1–O3      | 137.51(4) | F1–Al1–F2      | 174.49(6) |
| F1–Ba1–O3      | 146.81(4) | F1–Al1–O1      | 91.25(6)  |
| O1–Ba1–O3      | 59.04(4)  | F2–Al1–O1      | 88.67(6)  |
| F2–Ba1–O3      | 51.40(4)  | F1–Al1–O3      | 88.68(6)  |
| O6–Ba1–O3      | 65.09(4)  | F2–Al1–O3      | 85.89(6)  |
| O3–Ba1–O3      | 104.23(3) | O1–Al1–O3      | 98.44(6)  |
| O4–Ba1–O3      | 113.33(4) | F1–Al1–O5      | 91.17(6)  |
| F2–Ba1–B3      | 90.59(5)  | F2–Al1–O5      | 90.04(6)  |

Symmetry transformations used to generate equivalent atoms:

#1: -X, -Y, 1-Z; #2: +X, +Y, 1+Z; #3: +X, 0.5-Y, 0.5+Z; #4: -X, -0.5+Y, 1.5-Z; #5: -1+X, 0.5-

Y, 0.5+Z; #6: -1+X, +Y, +Z; #7: -1+X, 0.5-Y, -0.5+Z; #8: 1-X, -0.5+Y, 1.5-Z; #9: +X, 0.5-Y, -0.5+Z; #10: +X, +Y, -1+Z; #11: -X, 0.5+Y, 1.5-Z; #12: 1+X, 0.5-Y, 0.5+Z; #13: 1+X, 0.5-Y, -0.5+Z; #14: 1+X, +Y, +Z; #15: 1-X, 0.5+Y, 1.5-Z;

**Table S6.** Bond lengths [ $\text{\AA}$ ] for  $\text{BaAl}_2(\text{B}_3\text{O}_6)_2\text{F}_2$ .

| Atom-Atom | lengths  | Atom-Atom | lengths  |
|-----------|----------|-----------|----------|
| Ba1-F1#1  | 2.640(4) | Ba1-O2#3  | 3.150(2) |
| Ba1-F1    | 2.640(4) | Ba1-O2#6  | 3.150(2) |
| Ba1-O1#2  | 3.109(2) | Al1-F1    | 1.664(4) |
| Ba1-O1#3  | 3.109(3) | Al1-O2#8  | 1.743(2) |
| Ba1-O1#4  | 3.109(3) | Al1-O2    | 1.743(2) |
| Ba1-O1#5  | 3.109(3) | Al1-O2#9  | 1.743(2) |
| Ba1-O1#6  | 3.109(3) | B1-O2     | 1.325(4) |
| Ba1-O1#7  | 3.109(2) | B1-O1     | 1.390(4) |
| Ba1-O2#2  | 3.150(2) | B1-O1#10  | 1.392(4) |
| Ba1-O2#4  | 3.150(2) |           |          |

Symmetry transformations used to generate equivalent atoms:

#1:  $-3.66667+X-Y, 1.66667-Y, 1.16667-Z$ ; #2:  $0.66667-X+Y, -0.66667+Y, -0.16667+Z$ ; #3:  $-0.33333+X, 0.33333+X-Y, -0.16667+Z$ ; #4:  $1.66667-Y, 1.33333-X, -0.16667+Z$ ; #5:  $1.66667-X, 1.33333-Y, 1.33333-Z$ ; #6:  $0.66667+X-Y, -0.66667+X, 1.33333-Z$ ; #7:  $-0.33333+Y, 0.33333-X+Y, 1.33333-Z$ ; #8:  $1-X+Y, 1-X, +Z$ ; #9:  $1-Y, +X-Y, +Z$ ; #10:  $-X+Y, 1-X, +Z$ ; #11:  $1-Y, 1+X-Y, +Z$ ;

**Table S7.** Bond angles [deg] for BaAl<sub>2</sub>(B<sub>3</sub>O<sub>6</sub>)<sub>2</sub>F<sub>2</sub>.

| Atom–Atom–Atom | Angle [°] | Atom–Atom–Atom | Angle [°] |
|----------------|-----------|----------------|-----------|
| F1–Ba1–F1      | 180.0     | O1–Ba1–O2      | 58.03(6)  |
| F1–Ba1–O1      | 63.16(5)  | O1–Ba1–O2      | 149.32(6) |
| F1–Ba1–O1      | 116.83(5) | O1–Ba1–O2      | 104.79(6) |
| F1–Ba1–O1      | 63.17(5)  | O2–Ba1–O2      | 102.67(5) |
| F1–Ba1–O1      | 116.83(5) | F1–Ba1–O2      | 64.37(4)  |
| O1–Ba1–O1      | 101.21(6) | F1–Ba1–O2      | 115.63(4) |
| F1–Ba1–O1      | 63.17(5)  | O1–Ba1–O2      | 126.55(6) |
| F1–Ba1–O1      | 116.83(5) | O1–Ba1–O2      | 44.03(6)  |
| O1–Ba1–O1      | 101.21(6) | O1–Ba1–O2      | 62.47(6)  |
| O1–Ba1–O1      | 101.21(6) | O1–Ba1–O2      | 149.32(6) |
| F1–Ba1–O1      | 116.84(5) | O1–Ba1–O2      | 104.79(6) |
| F1–Ba1–O1      | 63.16(5)  | O1–Ba1–O2      | 58.03(6)  |
| O1–Ba1–O1      | 68.88(9)  | O2–Ba1–O2      | 102.67(5) |
| O1–Ba1–O1      | 166.53(9) | O2–Ba1–O2      | 102.67(5) |
| O1–Ba1–O1      | 89.95(9)  | F1–Ba1–O2      | 115.63(4) |
| F1–Ba1–O1      | 116.84(5) | F1–Ba1–O2      | 64.37(4)  |
| F1–Ba1–O1      | 63.16(5)  | O1–Ba1–O2      | 58.03(6)  |
| O1–Ba1–O1      | 89.95(9)  | O1–Ba1–O2      | 104.79(6) |
| O1–Ba1–O1      | 68.88(9)  | O1–Ba1–O2      | 149.32(6) |
| O1–Ba1–O1      | 166.53(9) | O1–Ba1–O2      | 62.46(6)  |
| O1–Ba1–O1      | 101.20(6) | O1–Ba1–O2      | 44.03(6)  |
| F1–Ba1–O1      | 116.84(5) | O1–Ba1–O2      | 126.54(6) |
| F1–Ba1–O1      | 63.16(5)  | O2–Ba1–O2      | 56.12(8)  |
| O1–Ba1–O1      | 166.53(9) | O2–Ba1–O2      | 106.07(8) |
| O1–Ba1–O1      | 89.95(9)  | O2–Ba1–O2      | 147.34(8) |
| O1–Ba1–O1      | 68.88(9)  | F1–Al1–O2      | 109.75(9) |
| O1–Ba1–O1      | 101.20(6) | F1–Al1–O2      | 109.75(9) |
| O1–Ba1–O1      | 101.20(6) | O2–Al1–O2      | 109.19(9) |
| F1–Ba1–O2      | 64.37(4)  | F1–Al1–O2      | 109.75(9) |
| F1–Ba1–O2      | 115.63(4) | O2–Al1–O2      | 109.19(9) |
| O1–Ba1–O2      | 44.03(6)  | O2–Al1–O2      | 109.19(9) |
| O1–Ba1–O2      | 62.47(6)  | O2–B1–O1       | 119.5(3)  |
| O1–Ba1–O2      | 126.55(6) | O2–B1–O1       | 122.3(3)  |
| O1–Ba1–O2      | 104.79(6) | O1–B1–O1       | 118.2(3)  |
| O1–Ba1–O2      | 58.03(6)  | Al1–F1–Ba1     | 180.0     |
| O1–Ba1–O2      | 149.32(6) | B1–O1–B1       | 121.8(3)  |
| F1–Ba1–O2      | 64.37(4)  | B1–O1–Ba1      | 95.29(19) |
| F1–Ba1–O2      | 115.63(4) | B1–O1–Ba1      | 134.4(2)  |



|           |           |            |            |
|-----------|-----------|------------|------------|
| O1–Ba1–O2 | 62.47(6)  | B1–O2–A11  | 132.0(2)   |
| O1–Ba1–O2 | 126.55(6) | B1–O2–Ba1  | 95.0(2)    |
| O1–Ba1–O2 | 44.03(6)  | A11–O2–Ba1 | 133.00(10) |

---

Symmetry transformations used to generate equivalent atoms:

#1:  $-3.66667+X-Y, 1.66667-Y, 1.16667-Z$ ; #2:  $0.66667-X+Y, -0.66667+Y, -0.16667+Z$ ; #3:  $-0.33333+X, 0.33333+X-Y, -0.16667+Z$ ; #4:  $1.66667-Y, 1.33333-X, -0.16667+Z$ ; #5:  $1.66667-X, 1.33333-Y, 1.33333-Z$ ; #6:  $0.66667+X-Y, -0.66667+X, 1.33333-Z$ ; #7:  $-0.33333+Y, 0.33333-X+Y, 1.33333-Z$ ; #8:  $1-X+Y, 1-X, +Z$ ; #9:  $1-Y, +X-Y, +Z$ ; #10:  $-X+Y, 1-X, +Z$ ; #11:  $1-Y, 1+X-Y, +Z$ ;

**Table S8.** Comparison of bandgap and birefringence for the known F-containing aluminoborates and the arrangement of the [Al-O/F] groups.

|                         | Compound                                                                                 | Band gap / eV | Cut-off edge / nm | birefringence | [Al-O/F]                           |
|-------------------------|------------------------------------------------------------------------------------------|---------------|-------------------|---------------|------------------------------------|
| Aluminoborate fluorides | $K_3Ba_3Li_2Al_4B_6O_{20}F^1$                                                            | > 6.2         | < 190             | 0.063         | [AlO <sub>4</sub> ]                |
|                         | $K_3Sr_3Li_2Al_4B_6O_{20}F^2$                                                            | > 6.2         | 190               | 0.062         | [AlO <sub>4</sub> ]                |
|                         | $Rb_3Ba_3Li_2Al_4B_6O_{20}F^3$                                                           | > 6.2         | 198               | 0.061         | [AlO <sub>4</sub> ]                |
| Fluoroaluminoborates    | $BaAlBO_3F_2^4$                                                                          | > 6.2         | 165               | 0.0418        | [AlO <sub>3</sub> F <sub>2</sub> ] |
|                         | $Rb_3Al_3B_3O_{10}F^5$                                                                   | 6.58*         | < 200             | /             | [AlO <sub>3</sub> F]               |
|                         | $CsAlB_3O_6F^6$                                                                          | 7.49*         | < 190             | 0.091         | [AlO <sub>3</sub> F]               |
|                         | $RbAlB_3O_6F^7$                                                                          | 7.15*         | < 190             | 0.0946        | [AlO <sub>3</sub> F]               |
|                         | $Cs_{0.5}Rb_{0.5}AlB_3O_6F^7$                                                            | > 6.2         | < 200             | /             | [AlO <sub>3</sub> F]               |
|                         | $Li_{0.5}Na_{0.5}AlB_2O_4F_2^8$                                                          | 7.55*         | < 200             | 0.108         | [AlO <sub>3</sub> F <sub>3</sub> ] |
|                         | $SrAlB_3O_6F_2^9$                                                                        | 7.65*         | < 200             | 0.075         | [AlO <sub>4</sub> F <sub>2</sub> ] |
|                         | $Sr_2Al_{2.18}B_{5.82}O_{13}F_2^{10}$                                                    | 7.28*         | < 200             | 0.058         | [AlO <sub>4</sub> F <sub>2</sub> ] |
|                         | $SnAl_2(BO_3)_2F_2^{11}$                                                                 | 4.08          | 240               | 0.024         | [AlO <sub>4</sub> F <sub>2</sub> ] |
|                         | $Al_8(BO_3)_4(B_2O_5)F_8^{12}$                                                           | 7.32*         | < 200             | /             | [AlO <sub>4</sub> F <sub>2</sub> ] |
|                         | $Pb_2Al_2B_3O_8F_3^{13}$                                                                 | 5.26          | 213               | 0.0458        | [AlO <sub>4</sub> F <sub>2</sub> ] |
|                         | $Pb_6AlB_2O_7F_7^{14}$                                                                   | 3.63          | < 300             | /             | [AlF <sub>6</sub> ]                |
|                         | $Al_6B_5O_{15}F_3^{15}$                                                                  | /             | /                 | /             | [AlO <sub>5</sub> F]               |
|                         | <b>BaAlB<sub>3</sub>O<sub>6</sub>F<sub>2</sub> (this work)</b>                           | <b>7.53*</b>  | < 200             | <b>0.087</b>  | [AlO <sub>4</sub> F <sub>2</sub> ] |
|                         | <b>BaAl<sub>2</sub>(B<sub>3</sub>O<sub>6</sub>)<sub>2</sub>F<sub>2</sub> (this work)</b> | <b>7.87*</b>  | < 200             | <b>0.105</b>  | [AlO <sub>3</sub> F]               |

\* DFT calculated results

**Figure S1.** Different arrangement of [Al-O/F] groups in (a)  $\text{BaAlBO}_3\text{F}_2$ , (b)  $\text{BaAlB}_3\text{O}_6\text{F}_2$ , and (c)  $\text{BaAl}_2(\text{B}_3\text{O}_6)_2\text{F}_2$ .

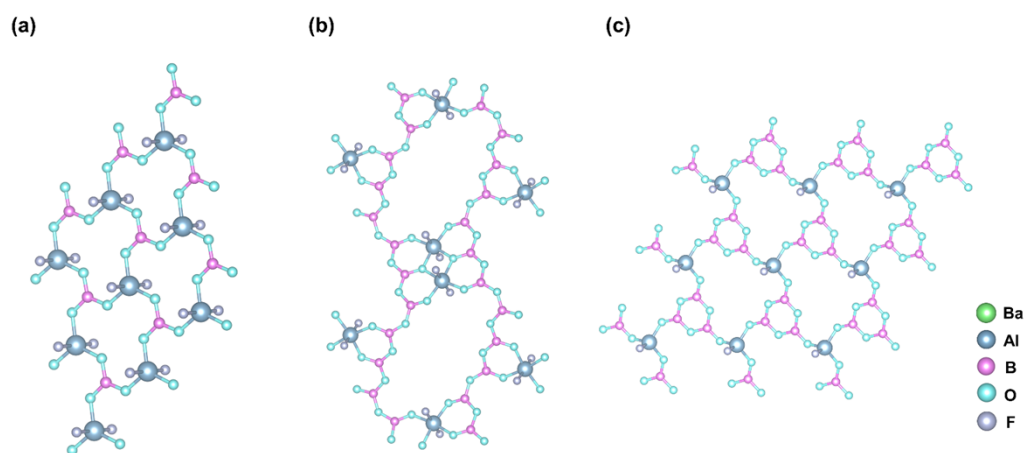

**Figure S2.** The experimental and calculated sample XRD patterns of (a)  $\text{BaAlB}_3\text{O}_6\text{F}_2$  and (b)  $\text{BaAl}_2(\text{B}_3\text{O}_6)_2\text{F}_2$ .

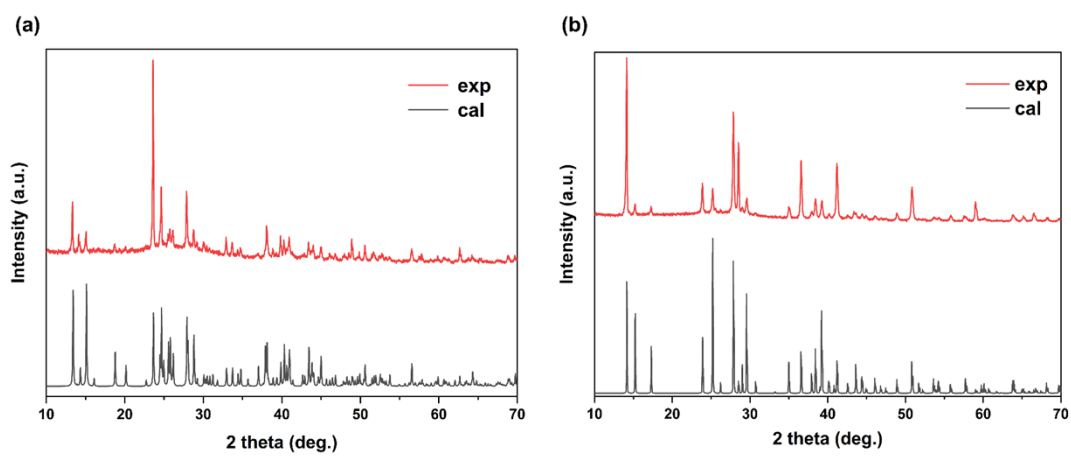

**Figure S3.** TG/DSC curves of (a)  $\text{BaAlB}_3\text{O}_6\text{F}_2$  and (b)  $\text{BaAl}_2(\text{B}_3\text{O}_6)_2\text{F}_2$ .

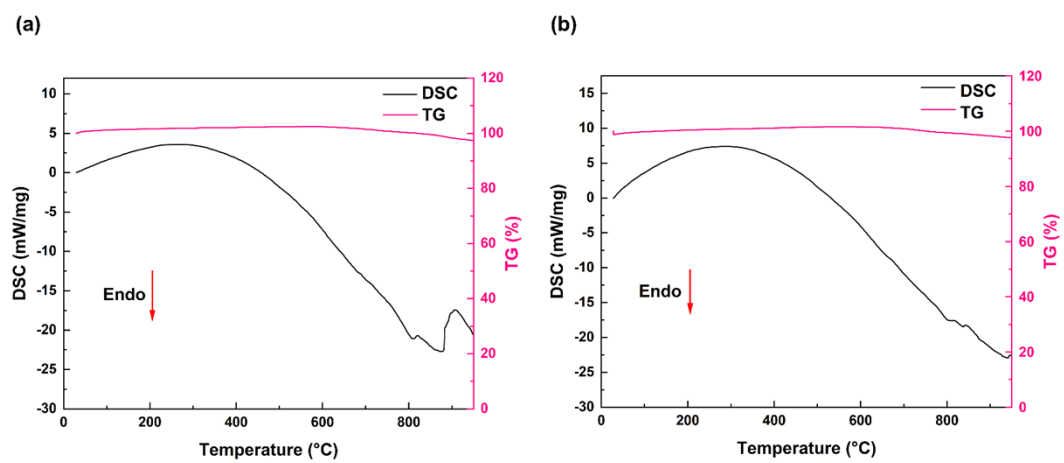

**Figure S4.** IR Spectra of (a)  $\text{BaAlB}_3\text{O}_6\text{F}_2$  and (b)  $\text{BaAl}_2(\text{B}_3\text{O}_6)_2\text{F}_2$ .

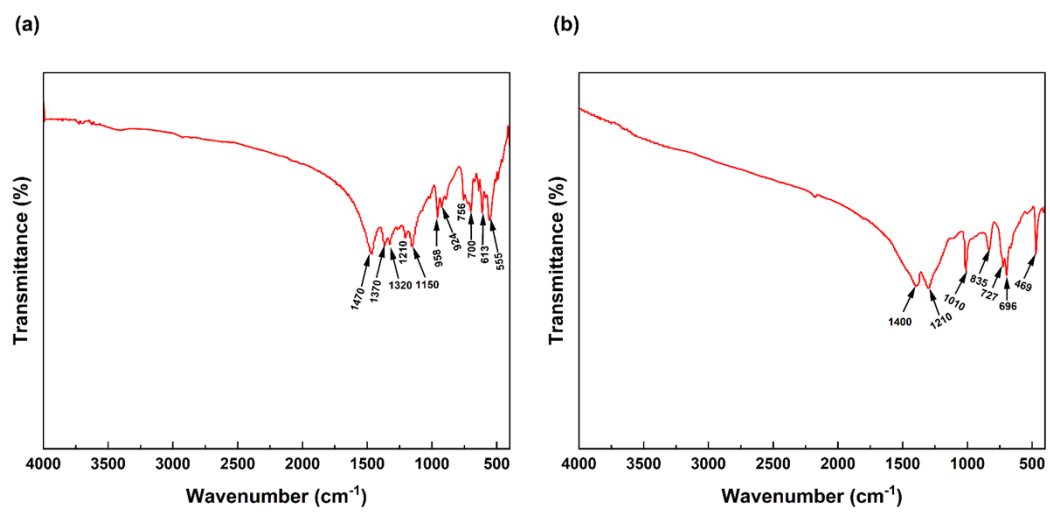

**Figure S5.** The measurement of thickness of (a)  $\text{BaAlB}_3\text{O}_6\text{F}_2$  and (b)  $\text{BaAl}_2(\text{B}_3\text{O}_6)_2\text{F}_2$ .

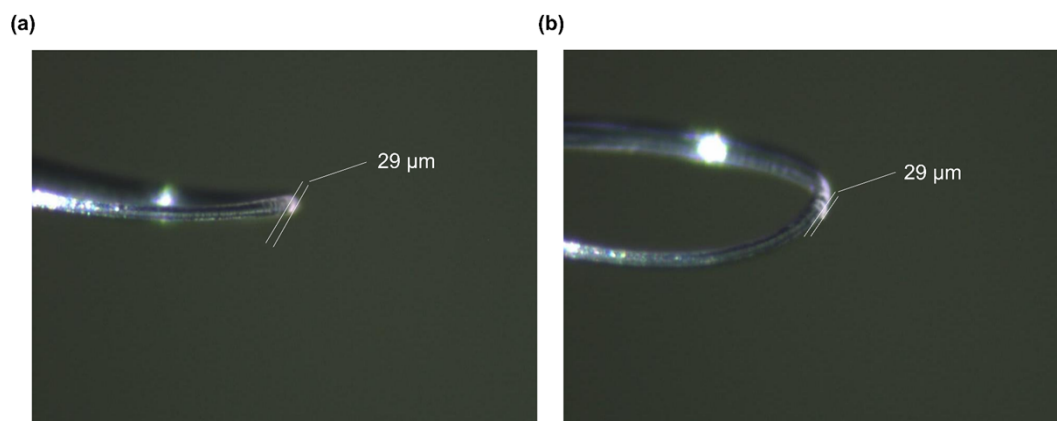

**Figure S6.** The calculated band gaps (HSE06) of (a)  $\text{BaAlB}_3\text{O}_6\text{F}_2$  and (b)  $\text{BaAl}_2(\text{B}_3\text{O}_6)_2\text{F}_2$ .

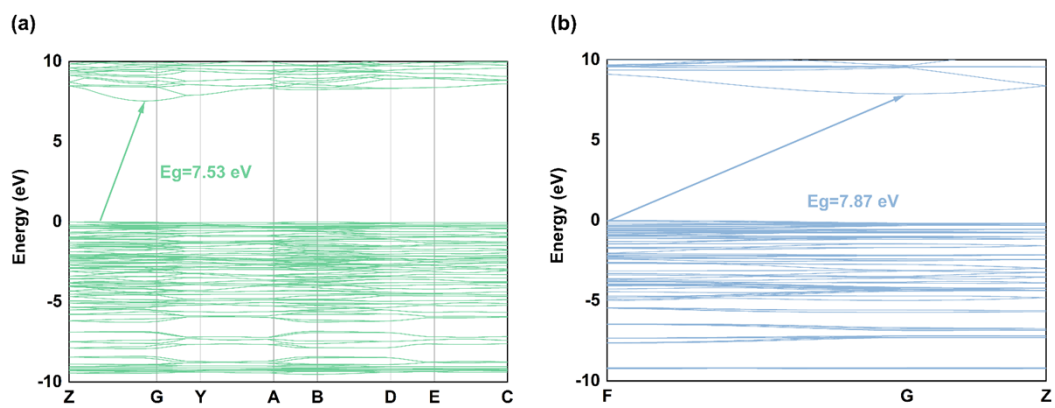



## References

1. B.Q. Zhao, B.X. Li, S.G. Zhao, X.T. Liu, Z.Y. Wu, Y.G. Shen, X.F. Li, Q.R. Ding, C.M. Ji and J.H. Luo, Physical properties of a promising nonlinear optical crystal  $K_3Ba_3Li_2Al_4B_6O_{20}F$ , *Cryst. Growth Des.*, 2018, **18**, 7368-7372.
2. Y. Yang, S.Z. Huang and S.L. Pan,  $K_3Sr_3Li_2Al_4B_6O_{20}F$ : a competitive nonlinear optical crystal for generation of a 266 nm laser, *J. Mater. Chem. C.*, 2022, **10**, 11232-11238.
3. J.K. Wang, H.P. Wu, Z.G. Hu, J.Y. Wang, Y.C. Wu and H.W. Yu, A promising ultraviolet nonlinear optical crystal:  $Rb_3Ba_3Li_2Al_4B_6O_{20}F$ —crystal growth, physical properties, and 266 nm laser generation, *J. Mater. Chem. C.*, 2023, **11**, 1320-1328.
4. Z.G. Hu, M. Yoshimura, K. Muramatsu, Y. Mori and T. Sasaki, A new nonlinear optical crystal-BaAlBO<sub>3</sub>F<sub>2</sub>(BABF), *Jpn. J. Appl. Phys.*, 2002, **41**, L1131-L1133.
5. S.G. Zhao, P.F. Gong, S.Y. Luo, S.J. Liu, L.N. Li, M.A. Asghar, T.K. Asghar, M.C. Hong, Z.S. Lin and J.H. Luo, Beryllium-free  $Rb_3Al_3B_3O_{10}F$  with reinforced interlayer bonding as a deep-ultraviolet nonlinear optical crystal, *J. Am. Chem. Soc.*, 2015, **137**, 2207-2210.
6. H.K. Liu, Y. Wang, B.B. Zhang, Z.H. Yang and S.L. Pan, CsAlB<sub>3</sub>O<sub>6</sub>F: a beryllium-free deep-ultraviolet nonlinear optical material with enhanced thermal stability, *Chem. Sci.*, 2020, **11**, 694-698.
7. H.K. Liu, B.B. Zhang, L. Li and Y. Wang, Exploring deep-UV nonlinear optical materials with enhanced second harmonic generation response and birefringence in fluoroaluminoborate crystals, *ACS Appl. Mater. Interfaces.*, 2021, **13**, 30853-30860.
8. Z.T. Yan, D.D. Chu, M. Zhang, Z.H. Yang and S.L. Pan,  $Li_{0.5}Na_{0.5}AlB_2O_4F_2$ : fluoroaluminoborate with aligned  $^{1\infty}[BO_2]$  chain induced by unprecedented  $[AlO_3F_3]^{6-}$  species features enhanced birefringence, *Adv. Opt. Mater.*, 2022, **11**, 2202353.
9. S. Bai, X.D. Zhang, B.B. Zhang, L. Li and Y. Wang,  $SrAlB_3O_6F_2$ : A fluoroaluminoborate with  $[Al_2B_6O_{14}F_4]$  units and large birefringence, *Inorg. Chem.*, 2021, **60**, 10006-10011.
10. J.H. Jiao, A. Tudi, Z.T. Yan and M. Zhang, Structural motif cosubstitution strategy for designing fluoroaluminoborate with the  $Sr_2Be_2B_2O_7$ -type double-layered structure, *Inorg. Chem.*, 2023, **62**, 4399-4404.
11. Y. Wang, J. Han, J.B. Huang, Z.H. Yang, S.Z. Huang and S.L. Pan, From  $BaAl_2(BO_3)_2O$  to  $SnAl_2(BO_3)_2F_2$ : structure transformation based on ion regulation, *New J. Chem.*, 2020, **44**, 9852-9857.
12. Y. Wang, J. Han, J.B. Huang, Z.H. Yang and S.L. Pan,  $Al_8(BO_3)_4(B_2O_5)F_8$ : A F-containing aluminum borate featuring two types of isolated B–O groups, *Inorg. Chem.*, 2019, **59**, 810-817.
13. B. Jiang, S. Shu, Z.H. Yang, F.F. Zhang, M. Zhang and S.L. Pan,  $Pb_2Al_2B_3O_8F_3$ : structure and properties of a new fluoroaluminoborate with non-traditional chain-like  $B_3O_8$  groups, *Dalton Trans.*, 2022, **51**, 3964-3969.
14. L.Y. Dong, S.L. Pan, Z.H. Yang, W.W. Zhao, X.Y. Dong, Y. Wang and Y.N. Huang, Synthesis, crystal structure, and properties of a new lead aluminum fluoride borate,  $Pb_6AlB_2O_7F_7$ , *Z. Anorg. Allg. Chem.*, 2012, **638**, 2280-2285.
15. E.V. Sokolova, Y.K. Egorov Tismenko, S.V. Kargal'tsev, V.A. Klyakhin and V.S. Urusov, Refinement of the crystalline structure of synthetic fluoruous jeremejevite  $Al_6[BO_3]_5F_3$ , *Geol. Geofiz.*, 1987, **42**, 82-84.
